# Supplementary material for: Global biogeographical regions of freshwater fish species
Source: bioRxiv or medRxiv preprint supplement (doi:10.1101/319566), 2019-06-12
Supplement: Supplementary file [file 319566-3.pdf]

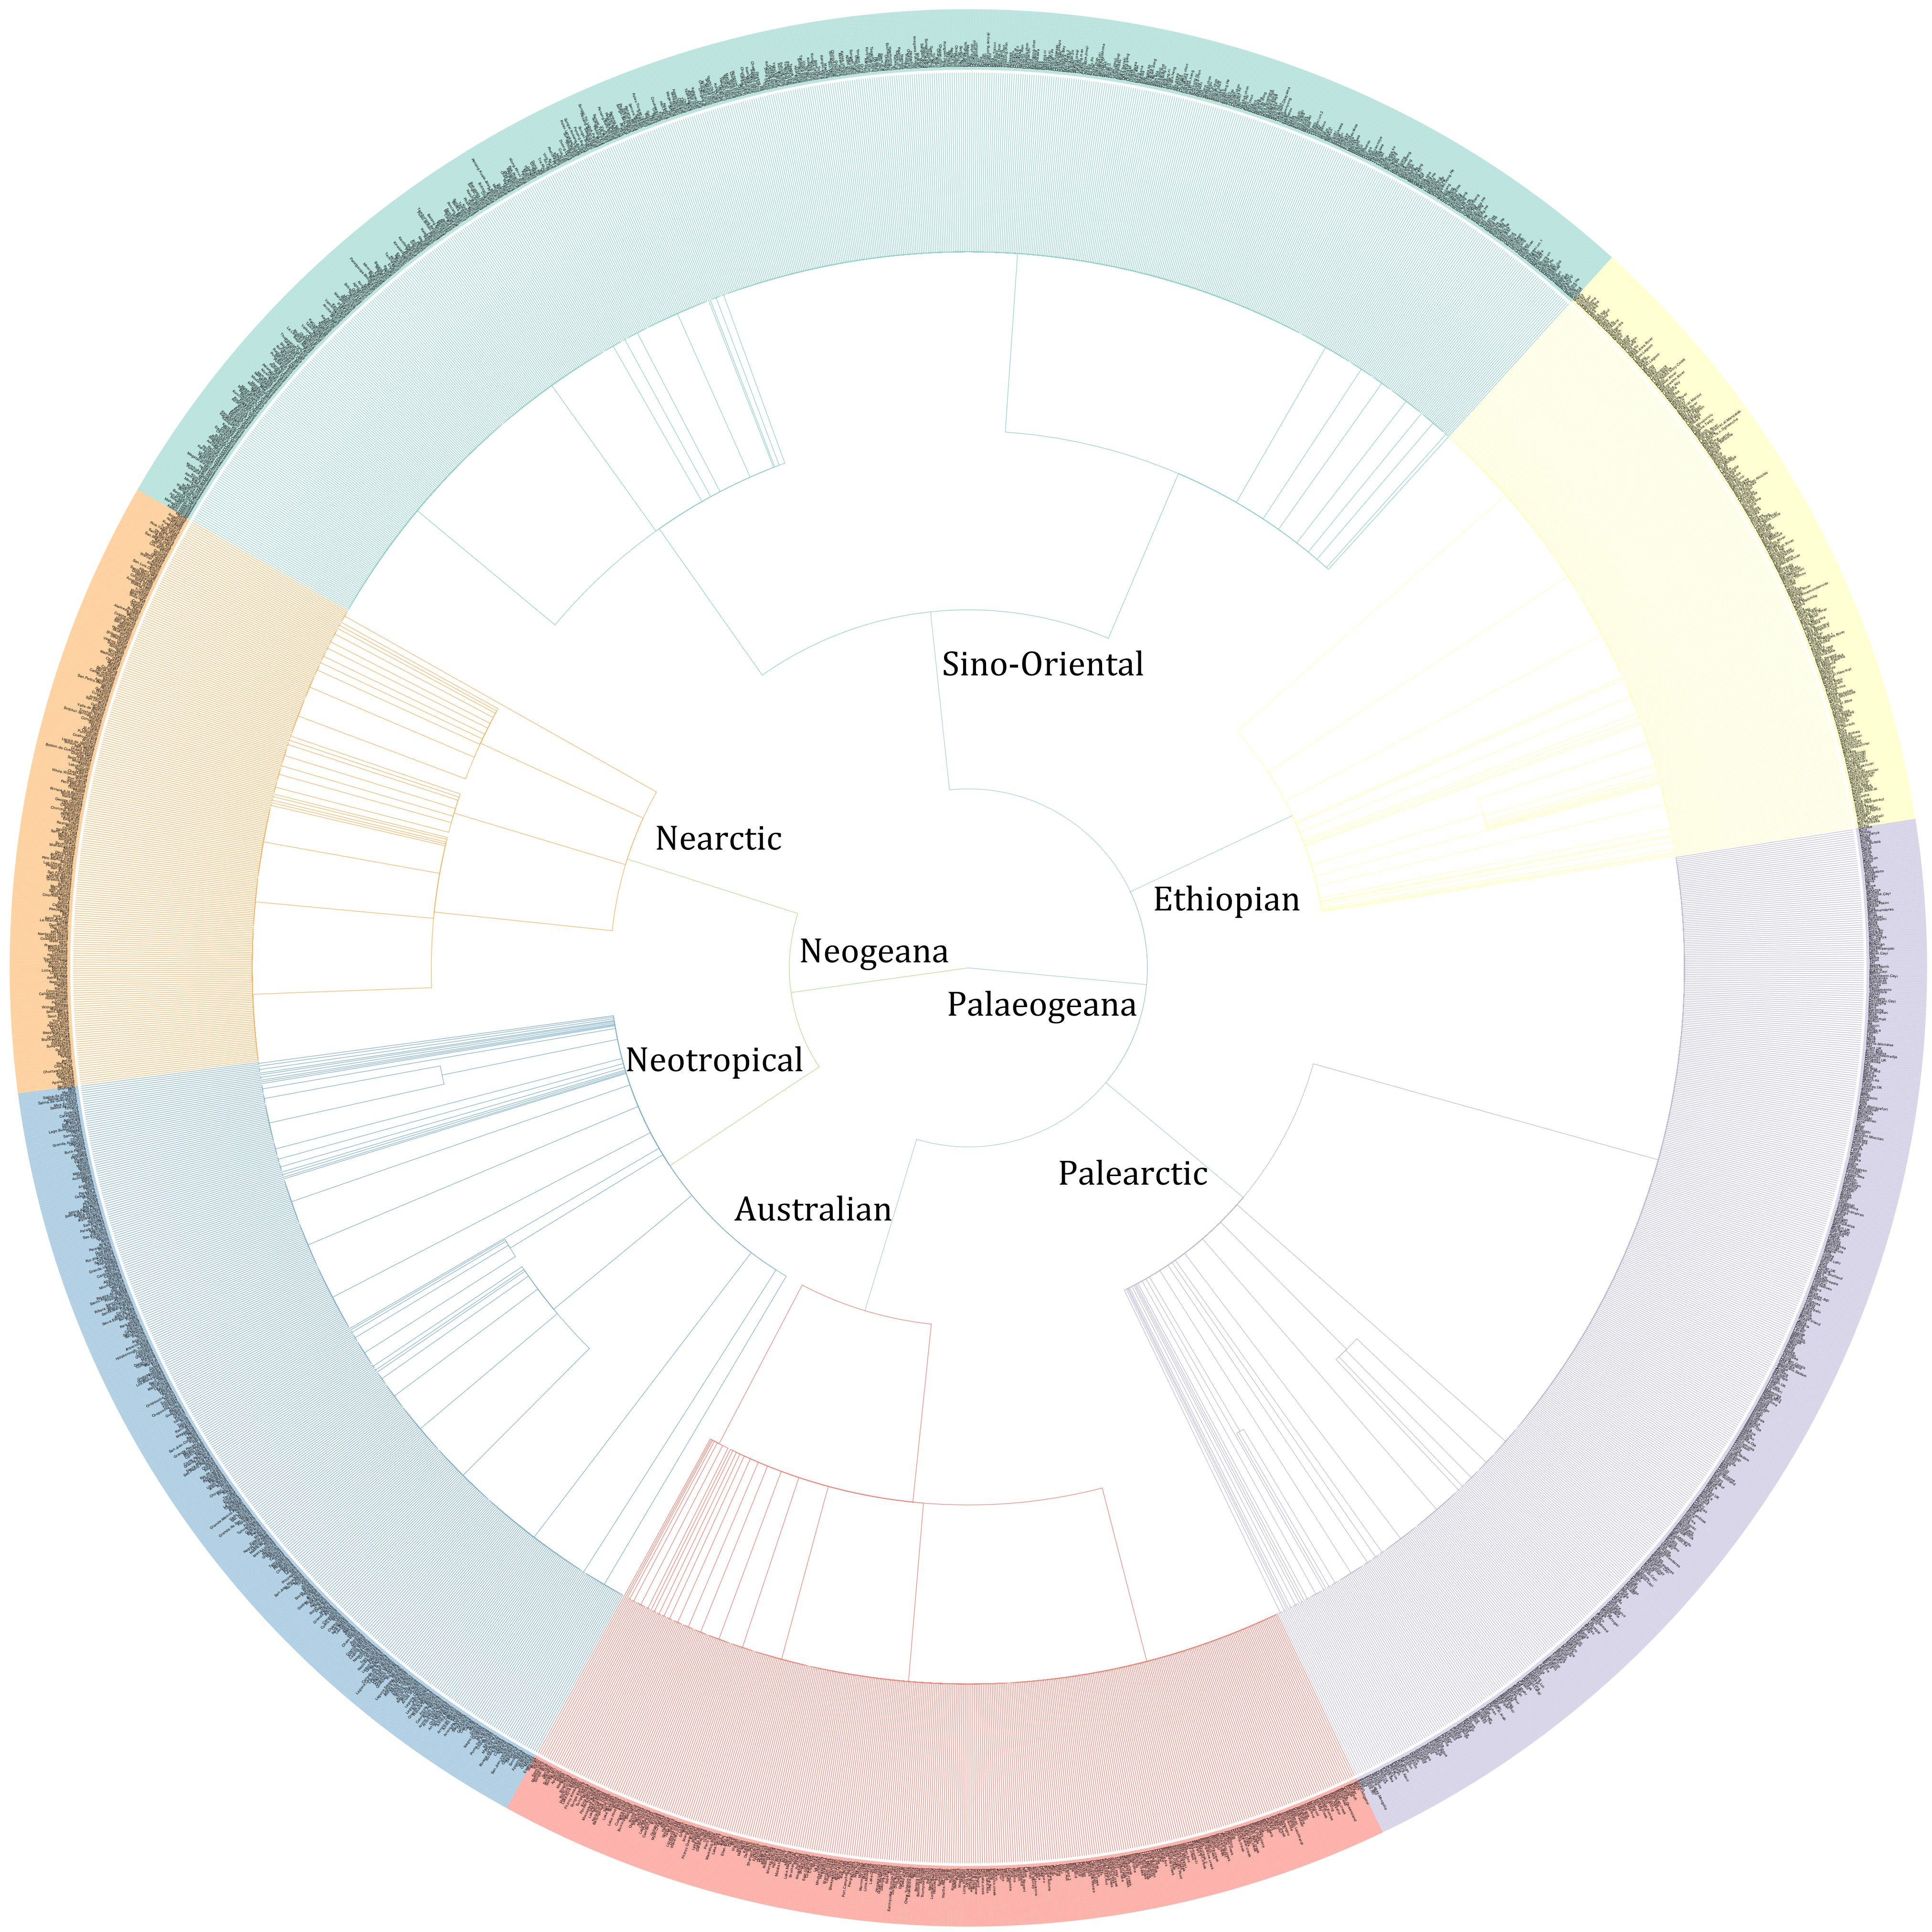

Sino-Oriental

Ethiopian

Palearctic

Australian

Neotropical

Neogeana

Nearctic
