# Supplementary material for: Global biogeographical regions of freshwater fish species
Source: bioRxiv or medRxiv preprint supplement (doi:10.1101/319566), 2019-06-12

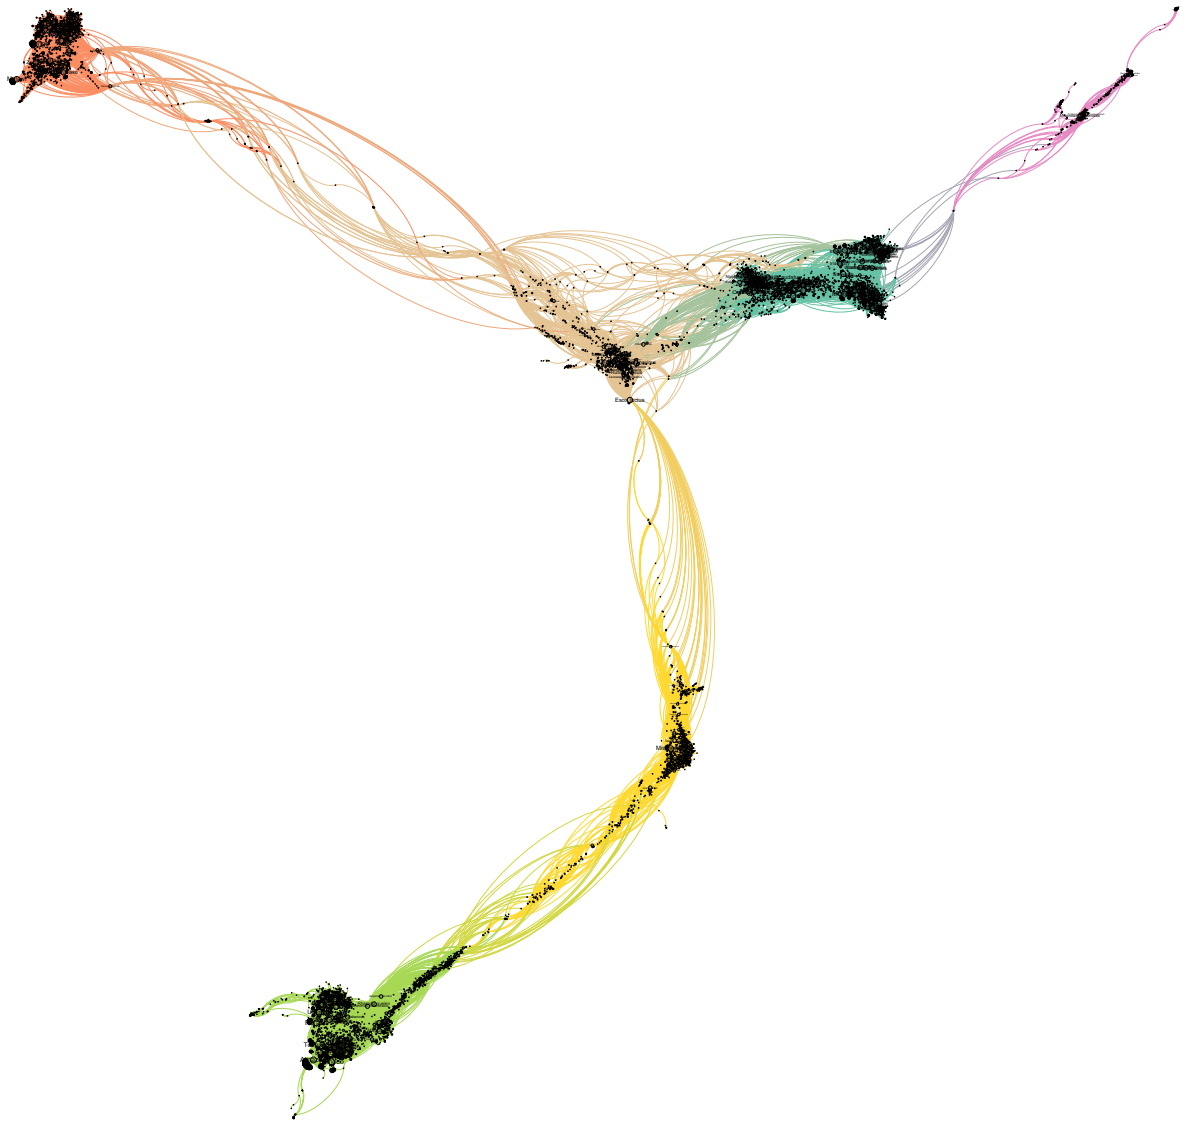

Supplement: Supplementary file [file media-6.pdf]
